# Supplementary material for: Iontronic pressure sensor with a wide linearity range for “plug-and-play” fingertip pulse recording and statistical cardiovascular monitoring
Source: Royal Society of Chemistry journal article supplement (doi:10.1039/d5mh01890k), 2025-12-10
Supplement: d5mh01890k1.pdf [file d5mh01890k1.pdf]

## Supplementary Material

### **Iontronic pressure sensor with wide linearity range for plug-and-play fingertip pulse recording and statistical cardiovascular monitoring**

**Lingyu Zhao, † \*,<sup>a</sup> Minkun Cai, † <sup>a,c</sup> Siqi Lu,<sup>b</sup> Gang Li,<sup>d</sup> Xinyi Zheng,<sup>b</sup> Jidong Shi\*,<sup>b</sup>**

<sup>a</sup>Department of Materials Science and Engineering, Southern University of Science and Technology, Shenzhen 518055, China.

<sup>b</sup>Shenzhen Key Laboratory of Ultraintense Laser and Advanced Material Technology, Center for Intense Laser Application Technology, College of Engineering Physics, Shenzhen Technology University, Shenzhen 518118, China.

<sup>c</sup>School of Chemistry and Chemical Engineering, Guangdong Provincial Key Lab of Green Chemical Product Technology, State Key Laboratory of Pulp and Paper Engineering, South China University of Technology, Guangzhou 510640, China.

<sup>d</sup>School of Fashion and Textiles, The Hong Kong Polytechnic University, Hung Hom, Kowloon, Hong Kong, 999077, China.

† Authors contributed equally.

\*Correspondence to: Dr. Lingyu Zhao, Department of Materials Science and Engineering, Southern University of Science and Technology, Shenzhen 518055, China. E-mail: zhaoly@sustech.edu.cn

Prof. Jidong Shi, Shenzhen Key Laboratory of Ultraintense Laser and Advanced Material Technology, Center for Intense Laser Application Technology, College of Engineering Physics, Shenzhen Technology University, Shenzhen, 518118, China. E-mail: shijidong@sztu.edu.cn

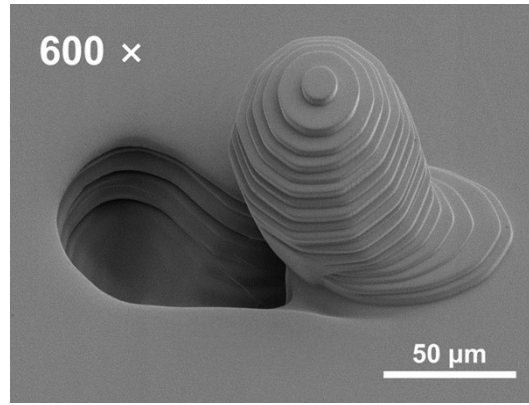

**Fig. S1.** SEM images of the hierarchical microstructure.

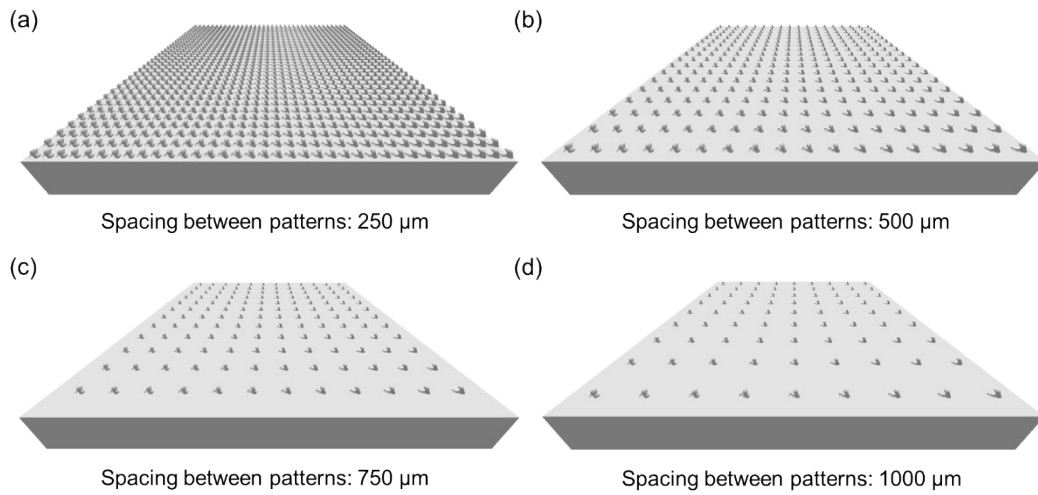

**Fig. S2.** Schematic illustration of pillar-groove array with varied inter-pattern spacings.

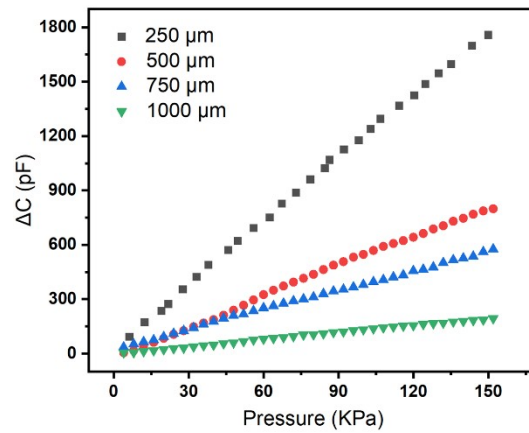

**Fig. S3.** The sensitivity of the iontronic sensors with different inter-pattern spacings.

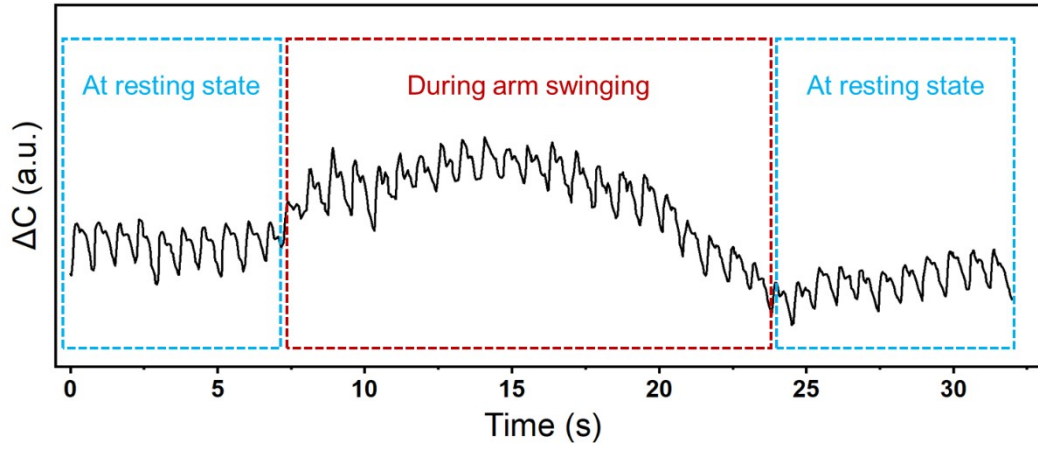

**Fig. S4.** Continuous fingertip pulse monitoring during arm swinging.

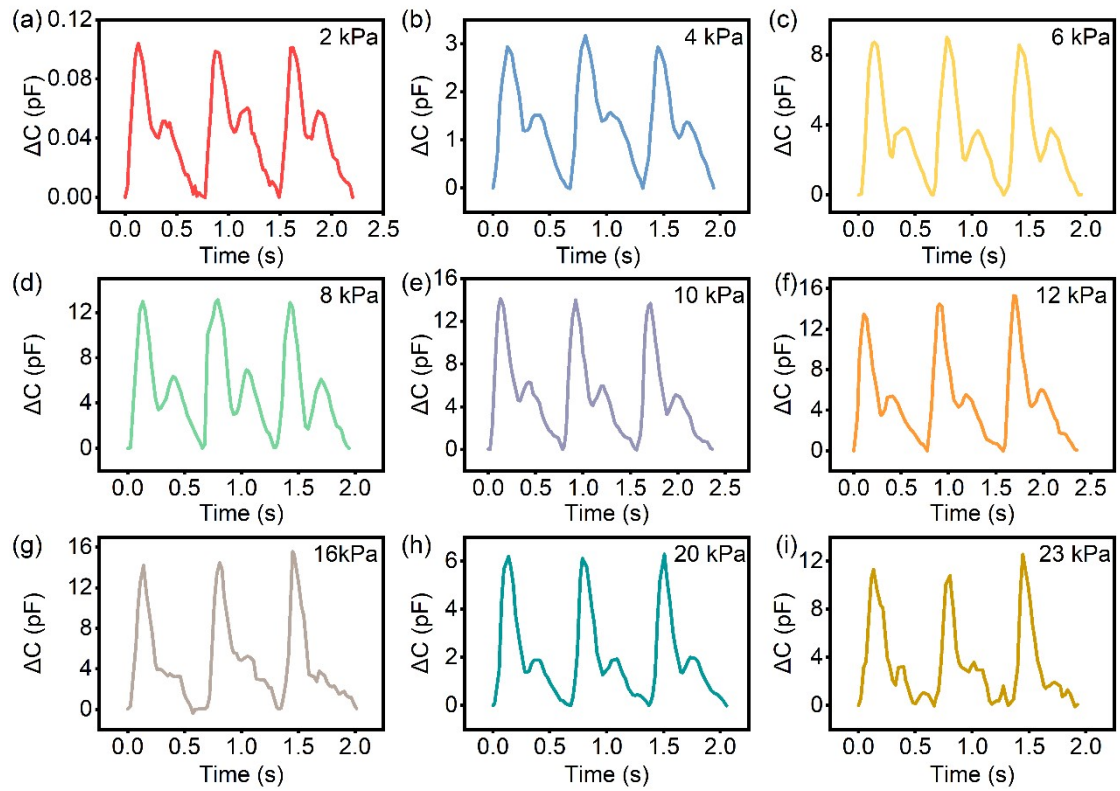

**Fig. S5.** Fingertip pulse waveforms of a 25-year-old subject at preloads of 2 kPa, 4 kPa, 6 kPa, 8 kPa, 10 kPa, 12 kPa, 16 kPa, 20 kPa, and 23 kPa.

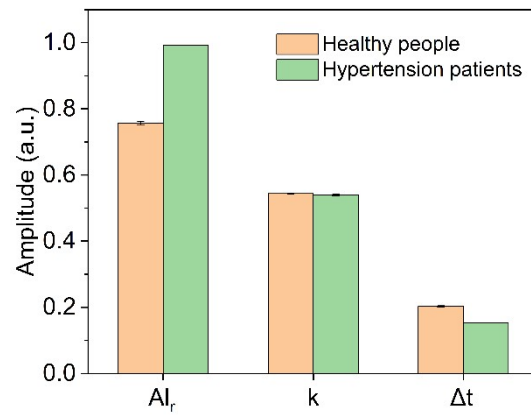

**Fig. S6.** The average value of  $AI_r$ ,  $k$  and  $\Delta t$  for healthy people and hypertension patients.
